# Supplementary material
Source: PubMed Central journal article supplement (PMC7735746)
Supplement: nn0c07187_si_001.pdf [file nn0c07187_si_001.pdf]

Supplementary Information

**Giant Transition-State Quasiparticle Spin-Hall Effect in an  
Exchange-Spin-Split Superconductor Detected by Nonlocal  
Magnon Spin Transport**

Kun-Rok Jeon,<sup>\*</sup> Jae-Chun Jeon, Xilin Zhou, Andrea Migliorini,

Jiho Yoon and Stuart S. P. Parkin<sup>\*</sup>

*Max Planck Institute of Microstructure Physics, Weinberg 2, 06120 Halle (Saale),  
Germany*

<sup>\*</sup>To whom correspondence should be addressed: jeonkunrok@gmail.com,  
stuart.parkin@halle-mpi.mpg.de

**This PDF file includes:**

Supplementary Text

Figs. S1 to S6

References (S1-S22)

### **Section S1. Estimation of the magnon spin-diffusion length of YIG.**

In this section, we estimate the magnon spin-diffusion length  $l_{sd}^m$  of 200-nm-thick single-crystalline YIG films used in the present study. According to the fabrication process outlined in Method, we prepare reference devices composed of Pt injector and detector only (Fig. S1a-d). These Pt are separated by a center-to-center distance  $d^{Pt-Pt}$  of 9–18  $\mu\text{m}$ , which corresponds to the regime where magnon spin currents decay exponentially.<sup>S1</sup> One can thus estimate  $l_{sd}^m$  from the  $d^{Pt-Pt}$ -dependent non-local voltages ( $\Delta V_{nl}^{el}$  and  $\Delta V_{nl}^{th}$  in Fig. S1e-h) using simple formulas:

$$\Delta V_{nl}^{el} = A \exp\left(-\frac{d^{Pt-Pt}}{l_{sd}^m}\right), \quad (\text{S1a})$$

$$\Delta V_{nl}^{th} = B \exp\left(-\frac{d^{Pt-Pt}}{l_{sd}^m}\right), \quad (\text{S1b})$$

where  $A$  and  $B$  are the proportional factor that is irrelevant to  $d^{Pt-Pt}$ . By fitting Eq. (S1) to the summarized data of  $\Delta V_{nl}^{el}(d^{Pt-Pt})$  and  $\Delta V_{nl}^{th}(d^{Pt-Pt})$  in Fig. S1i, we get  $l_{sd}^m = 11$  and 9  $\mu\text{m}$  for the electrically and thermally driven magnons, respectively, at room temperature. Both cases appear to be almost independent of  $T_{\text{base}}$  (Fig. S1j). These are in good agreement with previous experiments<sup>S2,S3</sup> based on YIG thin films of similar quality and thickness.

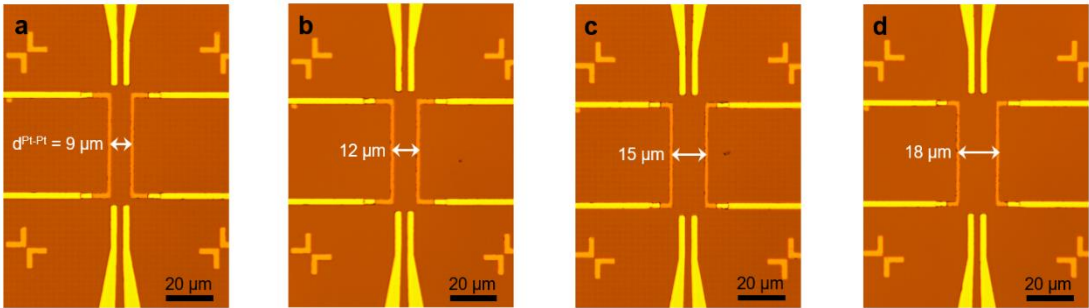

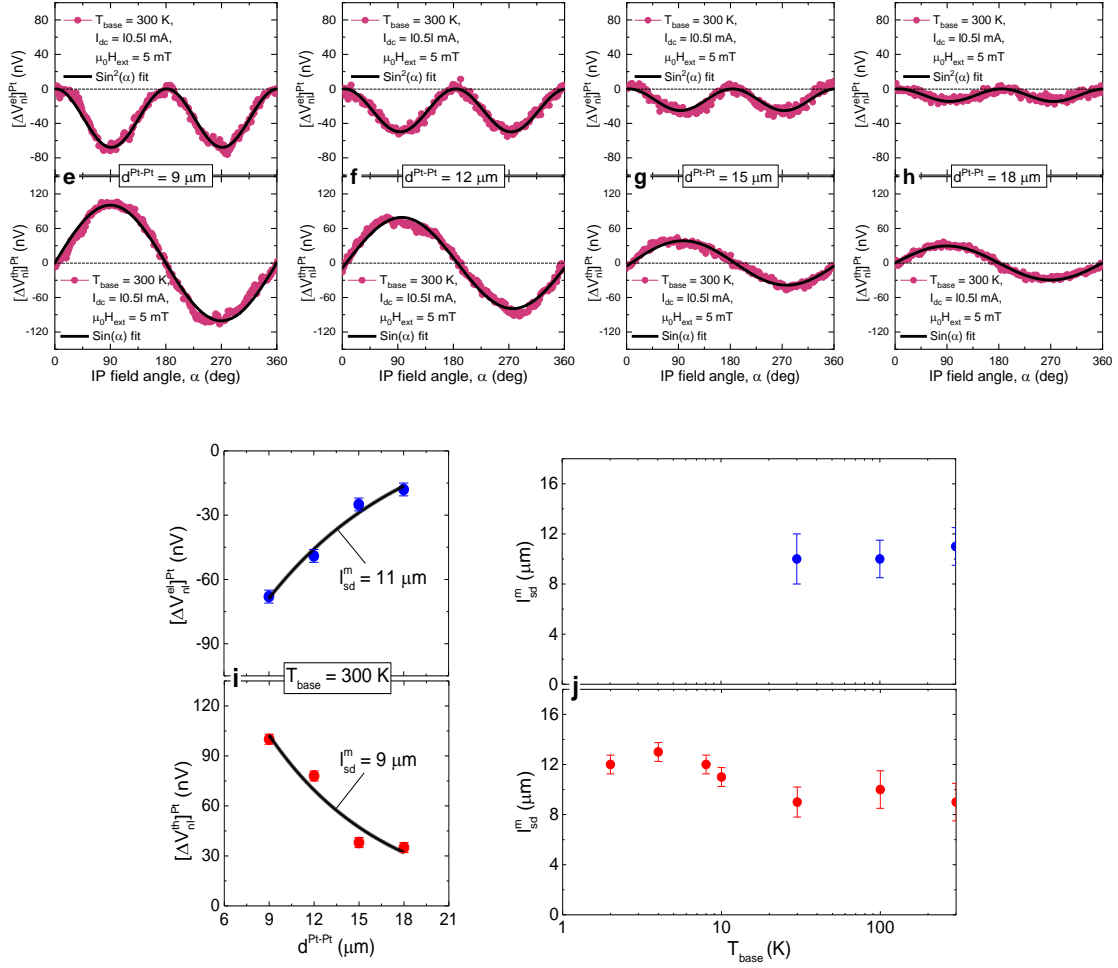

**Figure S1. Non-local magnon spin-transport signals in the Pt-only reference devices.** **a-d**, Optical micrographs of the fabricated reference devices with different  $d^{Pt-Pt}$  (9–18  $\mu\text{m}$ ). **e-h**, Corresponding IP field-angle  $\alpha$  dependence of non-local voltages,  $\Delta V_{nl}^{el}$  (top) and  $\Delta V_{nl}^{th}$  (bottom) driven electrically and thermally, respectively, at 300 K. In these measurements,  $I_{\text{dc}}$  is fixed at |0.5| mA and the magnetic field  $\mu_0 H_{\text{ext}}$  at 5 mT. **i**, Summary of  $\Delta V_{nl}^{el}$  (top) and  $\Delta V_{nl}^{th}$  (bottom) as a function of  $d^{Pt-Pt}$ . The black solid line represents an exponential fit to estimate  $l_{sd}^m$ . **j**, Base temperature  $T_{\text{base}}$  evolution of the estimated  $l_{sd}^m$ .

## Section S2. Quantification of spin currents leaking into the central Nb at room temperature.

Using the non-local magnon spin transport theory,<sup>S4,S5,S6</sup> we here quantify how much spin current density  $J_{S0}^{Pt}$  reaching at the YIG/Pt interface is reduced due to the presence of the

central Nb. The iSHE voltages  $V_{iSHE}^{Pt}$  read in the Pt detector with and without the  $Al_2O_3$  spin-blocking layer are, respectively, expressed as

$$V_{iSHE}^{Pt, \text{ with } Al_2O_3} = \theta_{SH}^{Pt} J_{s0}^{Pt, \text{ with } Al_2O_3} \left( \frac{l_{sd}^{Pt}}{t_{Pt}} \right) \tanh \left( \frac{t_{Pt}}{2l_{sd}^{Pt}} \right) \left( \frac{2e}{\hbar} \right) \rho_{Pt} l_y^{Pt}, \quad (S2a)$$

$$V_{iSHE}^{Pt, \text{ no } Al_2O_3} = \theta_{SH}^{Pt} J_{s0}^{Pt, \text{ no } Al_2O_3} \left( \frac{l_{sd}^{Pt}}{t_{Pt}} \right) \tanh \left( \frac{t_{Pt}}{2l_{sd}^{Pt}} \right) \left( \frac{2e}{\hbar} \right) \rho_{Pt} l_y^{Pt}, \quad (S2b)$$

where  $\theta_{SH}^{Pt}$  ( $l_{sd}^{Pt}$ ) is the spin-Hall angle (spin-diffusion length) of the Pt detector, assumed to be 0.1 (1.5 nm).<sup>S4,S6</sup>  $\rho_{Pt}$  is the resistivity of the Pt, which is  $\sim 28 \mu\Omega\text{-cm}$  at 300 K extracted from the two-terminal Pt resistance of different thicknesses (6–10 nm).  $t_{Pt}$  ( $l_y^{Pt}$ ) is the thickness (length) of the Pt. Accordingly, the reduced spin current density is

$$\Delta J_{s0}^{Pt} = J_{s0}^{Pt, \text{ with } Al_2O_3} - J_{s0}^{Pt, \text{ no } Al_2O_3} = \left[ \frac{V_{iSHE}^{Pt, \text{ with } Al_2O_3} - V_{iSHE}^{Pt, \text{ no } Al_2O_3}}{\theta_{SH}^{Pt} \left( \frac{l_{sd}^{Pt}}{t_{Pt}} \right) \tanh \left( \frac{t_{Pt}}{2l_{sd}^{Pt}} \right) \left( \frac{2e}{\hbar} \right) \rho_{Pt} l_y^{Pt}} \right]. \quad (S3)$$

Using Eq. S3 with the measured values ( $[\Delta V_{nl}^{el}]^{Pt, \text{ no } Al_2O_3}$ ,  $[\Delta V_{nl}^{el}]^{Pt, \text{ with } Al_2O_3}$ ,  $[\Delta V_{nl}^{th}]^{Pt, \text{ no } Al_2O_3}$ ,  $[\Delta V_{nl}^{th}]^{Pt, \text{ with } Al_2O_3}$ ) in Fig. 1e,f,h,i of the main text, we find  $\Delta j_{s0}^{Pt} = 2.3 \text{ A/cm}^2$  for electrically driven magnons and  $\Delta j_{s0}^{Pt} = 2.2 \text{ A/cm}^2$  for thermal driven magnons at  $I_{dc} = |1.0| \text{ mA}$  ( $J_{dc} = |6.6| \text{ MA/cm}^2$ ). We note that the spin transfer efficiency  $\eta_s$  of our device ( $d_x^{Pt-Pt} = 15 \mu\text{m}$ ), defined as  $\eta_s = \frac{J_{s0}^{Pt}}{\theta_{SH}^{Pt} J_{dc}}$ , is of the order of  $10^{-5}$ , similar to reported from previous studies.<sup>S4,S6</sup>

### **Section S3. First-order estimate of the YIG-induced internal field at the Nb/YIG interface.**

In this section, we attempt to get a first-order estimate of the YIG-induced internal field  $\mu_0 H_{int}$  at the Nb/YIG interface from the measured  $T_c$  data (Fig. S2a), with *versus* without the presence of  $Al_2O_3$  barrier between Nb and YIG films, in the framework of Ginzburg-

Landau theory:<sup>S7,S8</sup>

$$\mu_0 H_{int} \approx \frac{\phi_0}{2\pi[\xi(0)]^2} \cdot \left\{ \left[ \frac{T_c^{w/Al_2O_3}}{T_c^{w/o Al_2O_3}} \right]^2 - 1 \right\} \quad (S4).$$

Here  $k_B$  is Boltzmann's constant,  $\phi_0$  is the flux quantum ( $2.07 \times 10^{-15} T \cdot m^2$ ), and  $\xi(0)$  is the zero-temperature (Ginzburg-Landau) coherence length of Nb thin film ( $\sim 15$  nm)<sup>S9</sup> in the dirty limit. Since *in-plane* stray fields (from the *un-patterned/continuous* YIG) at the Nb interface do not decay significantly by the presence of the 10-nm-thick  $Al_2O_3$  barrier and their strength is in the range of 0.01 – 0.1 T,<sup>S10,S11</sup> we consider  $\mu_0 H_{int}$  as the effective value for the exchange field  $h_{ex}$ . For the 15-nm-thick Nb layer,  $T_c^{w/Al_2O_3}$  ( $T_c^{w/o Al_2O_3}$ ) with (without) the  $Al_2O_3$  barrier at  $I_{dc} = 0.0$  mA is 5.50 K (4.42 K) in Fig. S2b, being as large as  $\mu_0 H_{int} \approx h_{ex} = 1.205$  T. The YIG-induced exchange spin-splitting at the Nb/YIG interface is then of 105  $\mu$ eV.

It is also important to note that for the  $Al_2O_3$ -absent device in Fig. S2b, the decay of  $T_c$  with increasing  $I_{dc}$  becomes more dramatic for  $I_{dc} > 0.5$  mA (black dashed line) than that extrapolated from direct heating of the whole device. This suggests that the strongly depressed superconductivity at a higher heating power (Fig. 3d of the main text) is likely caused by the spin-polarized QP injection/excitation into the Nb layer.

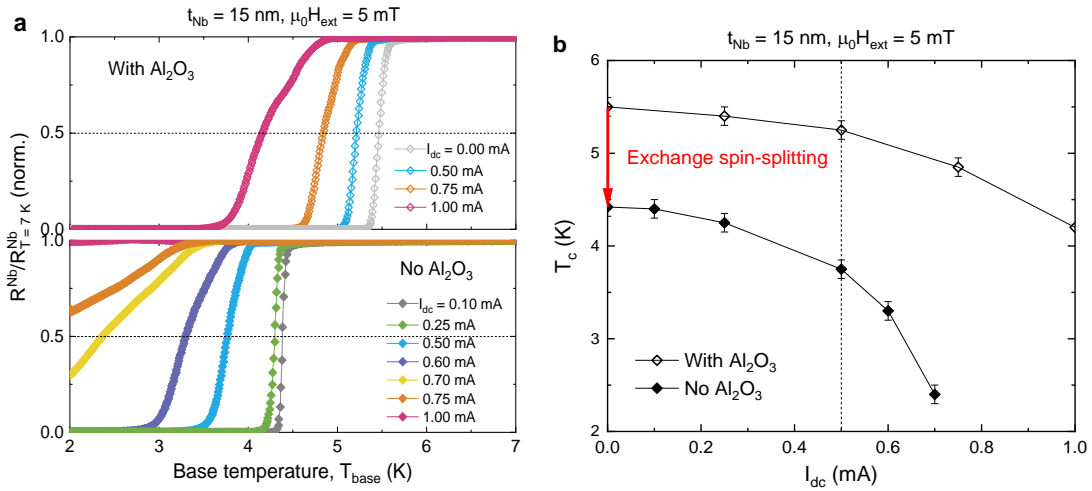

**Figure S2. a,** Nb resistance  $R^{Nb}$  versus  $T_{base}$  plots for the  $Al_2O_3$ -present (top) and  $Al_2O_3$ -

absent (bottom) devices, measured using a four-terminal current-voltage method (using leads 3,4,5,6 in Fig. 1b of the main text) while applying various  $I_{dc} = 0.0\text{--}1.0$  mA to the Pt injector. **b**, Summary of the measured  $T_c$  as a function of  $I_{dc}$ . Note that for  $I_{dc} \leq 0.5$  mA, the suppression of superconductivity by the spin-polarized QP injection/excitation is masked by the exchange spin-splitting effect (red arrow). So, the exchange spin-splitting plays a dominant role and determines the superconducting properties of the Nb layer.

### **Section S4. Theoretical description of the conversion efficiency of magnon spin to QP charge in the superconducting Nb.**

According to the recent models<sup>S12,S13</sup> which explicitly take superconducting coherence peaks into account for the effective spin mixing/transfer conductance of a FMI/SC interface, the excited QP spin current density  $J_{s0}^{qp}$  from incoherent magnons is given by

$$\frac{J_{s0}^{qp}}{J_{s0}} = \frac{\int_{-\infty}^{\infty} \left[ 1 + \frac{(\Delta^{SC})^2}{E(E + \Delta\mu_m)} \right] [f(E) - f(E + \Delta\mu_m)] n(E) n(E + \Delta\mu_m) dE}{\Delta\mu_m}, \quad (\text{S5})$$

$$n(E) = \frac{|E|}{\sqrt{E^2 - (\Delta^{SC})^2}} \theta[E^2 - (\Delta^{SC})^2], \quad (\text{S6})$$

where  $\left[ 1 + \frac{(\Delta^{SC})^2}{E(E + \Delta\mu_m)} \right]$  is the superconducting coherence factor<sup>S14</sup>.  $\Delta^{SC}(T) = 1.76k_B T_c \tanh\left(1.74 \sqrt{1 - \frac{T}{T_c}}\right)$  is the superconducting energy gap,  $k_B$  is the Boltzmann constant and  $f(E) = \frac{1}{\exp\left(\frac{E}{k_B T}\right) + 1}$  is the Fermi-Dirac (FD) distribution function.  $n(E)$  is the normalized QP DOS and  $\theta(E)$  is the Heaviside step function.  $\Delta\mu_m$  is the magnon spin accumulation underneath the Nb detector.  $J_{s0}$  is the normal-state spin current which is directly proportional to  $\Delta\mu_m$ . Assuming the interface spin Seebeck coefficient  $S_s = 4.5$   $\mu\text{V/K}$  for the Pt/YIG interface<sup>S6</sup> and using our data set (Fig. 3,4 of the main text), we infer the  $J_{dc}$  and  $t_{\text{Nb}}$  dependence of  $\Delta\mu_m$  for the calculations in Fig. 5 of the main text.

Combining Eq. S5 with Eq. S2 (but now for the Nb), we get the QP-mediated iSHE

voltage<sup>S15,S16</sup>  $V_{iSHE}^{qp}$  in the SC detector. We have previously used this model for *metallic/conducting* Nb/Ni<sub>8</sub>Fe<sub>2</sub> bilayers,<sup>S17</sup> but now include the superconducting coherence effect described above:

$$V_{iSHE}^{qp} = \theta_{SH}^{qp} j_{s0}^{qp} \left( \frac{l_*^{qp}}{t_{SC}} \right) \tanh \left( \frac{t_{SC}}{2l_*^{qp}} \right) \left( \frac{2e}{\hbar} \right) \rho_{SC}^* l_y \exp \left( -\frac{d_y}{\lambda_Q} \right), \quad (S7a)$$

$$V_{iSHE} = \theta_{SH} j_{s0} \left( \frac{l_{sd}}{t_{SC}} \right) \tanh \left( \frac{t_{SC}}{2l_{sd}} \right) \left( \frac{2e}{\hbar} \right) \rho_0 l_y, \quad (S7b)$$

$$\frac{V_{iSHE}^{qp}}{V_{iSHE}} = \left( \frac{\theta_{SH}^{qp}}{\theta_{SH}} \right) \left( \frac{j_{s0}^{qp}}{j_{s0}} \right) \left[ \frac{l_*^{qp} \tanh \left( \frac{t_{SC}}{2l_*^{qp}} \right)}{l_{sd} \tanh \left( \frac{t_{SC}}{2l_{sd}} \right)} \right] \left[ \frac{\rho_{SC}^*}{\rho_0} \right] \exp \left( -\frac{d_y}{\lambda_Q} \right), \quad (S7c)$$

$$\theta_{SH} = \theta_{SH}^{SJ} + \theta_{SH}^{SS}, \quad (S8a)$$

$$\theta_{SH}^{qp} = \theta_{SH}^{SJ} + \left[ \frac{\chi_S^0(T)}{2f_0(\Delta^{SC})} \right] \cdot \theta_{SH}^{SS}, \quad (S8b)$$

$$l_{sd} = \sqrt{D\tau_{sf}}, \quad (S9a)$$

$$l_*^{qp} = \sqrt{D_S \left( \frac{1}{\tau_{sf}^{qp}} + \frac{1}{\tau_{AR}} \right)^{-1}}, \quad (S9b)$$

$$\rho_{SC}^* = \rho_{SC}^{qp} v_Q, \quad (S10a)$$

$$v_Q = \left( \frac{2\lambda_Q}{l_y} \right) \tanh \left( \frac{l_y}{2\lambda_Q} \right), \quad (S10b)$$

$$\lambda_Q = \sqrt{D_Q \tau_Q}, \quad (S11)$$

$$D_S = \left[ \frac{\chi_S(T)}{2f(\Delta^{SC})} \right] D, \quad (S12a)$$

$$D_Q = \left[ \frac{2f(\Delta^{SC})}{\chi_Q(T)} \right] D, \quad (S12b)$$

$$\chi_S(T) = 2 \int_{\Delta^{SC}}^{\infty} \frac{E}{\sqrt{E^2 - (\Delta^{SC})^2}} \left[ -\frac{\partial f(E)}{\partial E} \right] dE, \quad (S13a)$$

$$\chi_Q(T) = 2 \int_{\Delta^{SC}}^{\infty} \frac{\sqrt{E^2 - (\Delta^{SC})^2}}{E} \left[ -\frac{\partial f(E)}{\partial E} \right] dE, \quad (S13b)$$

where  $l_y \approx l_y^{Pt} + l_{sd}^m$  is the spin-active length of the Nb detector, given approximately by the sum of the length of the Pt injector  $l_y^{Pt}$  and  $l_{sd}^m$  in our device geometry (see Fig. S5).

The postfactor  $\exp\left(-\frac{d_y}{\lambda_Q}\right)$  in Eq. (S7a) represents the spatial decay of the QP charge-imbalance effect *outside* the spin-active regime of the Nb detector, where  $d_y$  is the distance between the inner edges of the QP-spin-excited Nb and the Au/Ru electrical lead (see Figs. 1b and S5b). In the following calculation, we ignore this factor as it is fundamentally linked to the QP charge-imbalance relaxation.  $\theta_{SH}$  ( $\theta_{SH}^{qp}$ ) is the electron (QP) spin-Hall angle of the Nb in the normal (superconducting) state. We assume that the Nb spin-Hall angle is given by two extrinsic components<sup>S15,S16</sup> of the side jump  $\theta_{SH}^{SJ}$ <sup>S18</sup> and the skew scattering  $\theta_{SH}^{SS}$ <sup>S19</sup>.  $D_S$  ( $D_Q$ ) is the spin (charge) diffusion coefficient of the QPs and  $D$  is the electron diffusion coefficient in the normal state.  $l_{sd}$  ( $\tau_{sf}$ ) is the electron spin-imbalance relaxation length (time) in the normal state.  $l_*^{qp}$  is the effective QP spin transport length considering the conversion time  $\tau_{AR}$  of QPs into singlet Cooper pairs by Andreev reflection in addition to their  $\tau_{sf}^{qp}$ .  $\rho_{SC}^*$  is the effective resistivity of the superconducting Nb and  $v_Q$  is the volume fraction of the QP charge imbalance.<sup>S15,S17</sup>  $\rho_{SC}^{qp} = \frac{\rho_0}{2f_0(\Delta^{SC})}$  is the QP resistivity,  $\rho_0$  is the residual resistivity of the Nb detector immediately above  $T_c$  and  $f(\Delta^{SC}) = \frac{1}{\exp\left(\frac{\Delta^{SC}}{k_B T}\right) + 1}$  is the FD distribution function at  $\Delta^{SC}$ .  $\lambda_Q$  ( $\tau_Q$ ) is the QP charge-imbalance relaxation length (time).  $\chi_Q(T)$  [ $\chi_S(T)$ ] is the normalized charge (spin) susceptibility of the QPs.

To assure that  $j_{s0}^{qp}$  (Fig. 5a,b of the main text) and  $\rho_{SC}^*$  (insets of Fig. 5e,f of the main text) are governing parameters in  $V_{iSHE}^{qp}$ , we calculate how other terms  $\left[\theta_{SH}^{qp}, l_*^{qp} \tanh\left(\frac{t_{SC}}{2l_*^{qp}}\right)\right]$  in Eq. (S7c) evolve across  $T_c$ . Figure S3 shows the calculated values of  $\frac{\chi_S^0(T)}{2f_0(\Delta^{SC})}$  and  $l_*^{qp} \tanh\left(\frac{t_{SC}}{2l_*^{qp}}\right)$ . As the superconducting transition does not influence  $\theta_{SH}^{SJ}$ ,<sup>S15,S16</sup> we only consider  $\theta_{SH}^{SS} \propto \frac{\chi_S^0(T)}{2f_0(\Delta^{SC})}$  [Eq. (S8b)]. We also note that if  $\tau_{AR}$



$\langle \tau_{sf}^{qp} \rangle$  [Eq. (S9b)], the effective transport length of QP spin is limited by the coherence length:<sup>S20,S21</sup>  $l_*^{qp} \approx \xi_{SC}$ .

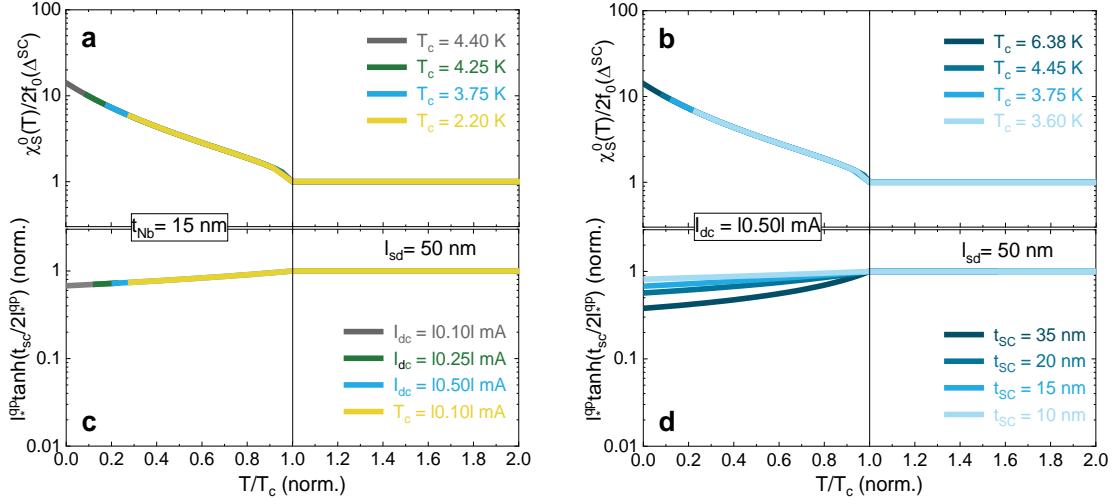

**Figure S3. Model calculation.** Calculated values of  $\frac{\chi_S^0(T)}{2f_0(\Delta^{SC})}$  (**a,b**) and  $l_*^{qp} \tanh\left(\frac{t_{SC}}{2l_*^{qp}}\right)$  (**c,d**) as a function of  $T/T_c$ . In the calculation, we use  $l_{sd} = 50$  nm for the Nb.<sup>S20</sup> As can be seen in **d**, in the zero- $T$  limit ( $T/T_c \rightarrow 0$ ),  $l_*^{qp}$  is limited by  $\xi_{SC}$ <sup>S20,S21</sup> if  $t_{SC}$  is thicker.

It is evident from Fig. S3 that none of  $\frac{\chi_S^0(T)}{2f_0(\Delta^{SC})}$  and  $l_*^{qp} \tanh\left(\frac{t_{SC}}{2l_*^{qp}}\right)$  vary significantly in the vicinity of  $T_c$ . We therefore conclude that the giant transition-state QP iSHE observed in our system comes predominantly from a trade-off of  $j_{s0}^{qp}$  and  $\rho_{SC}^*$ , linked respectively to the superconducting coherence and the QP charge-imbalance relaxation.

### **Section S5. Spatially resolved measurements by varying the separation of electrical contacts on the spin-split Nb layer.**

For the spatially resolved measurements presented in Fig. 6 of the main text, we prepared several independent devices on a single-piece YIG film, where only the separation distance  $d_s$  of Au/Ru electrical contacts on the 15-nm-thick Nb layer is different and it is

systematically controlled by depositing a 20-nm-thick  $\text{Al}_2\text{O}_3$  insulating layer in-between Au/Ru and Nb layers. Note that we observed  $d_s$ -independent non-local spin signals at 300 K when using the Pt detector, indicating almost similar magnon spin-transport properties in the fabricated devices (Fig. S4).

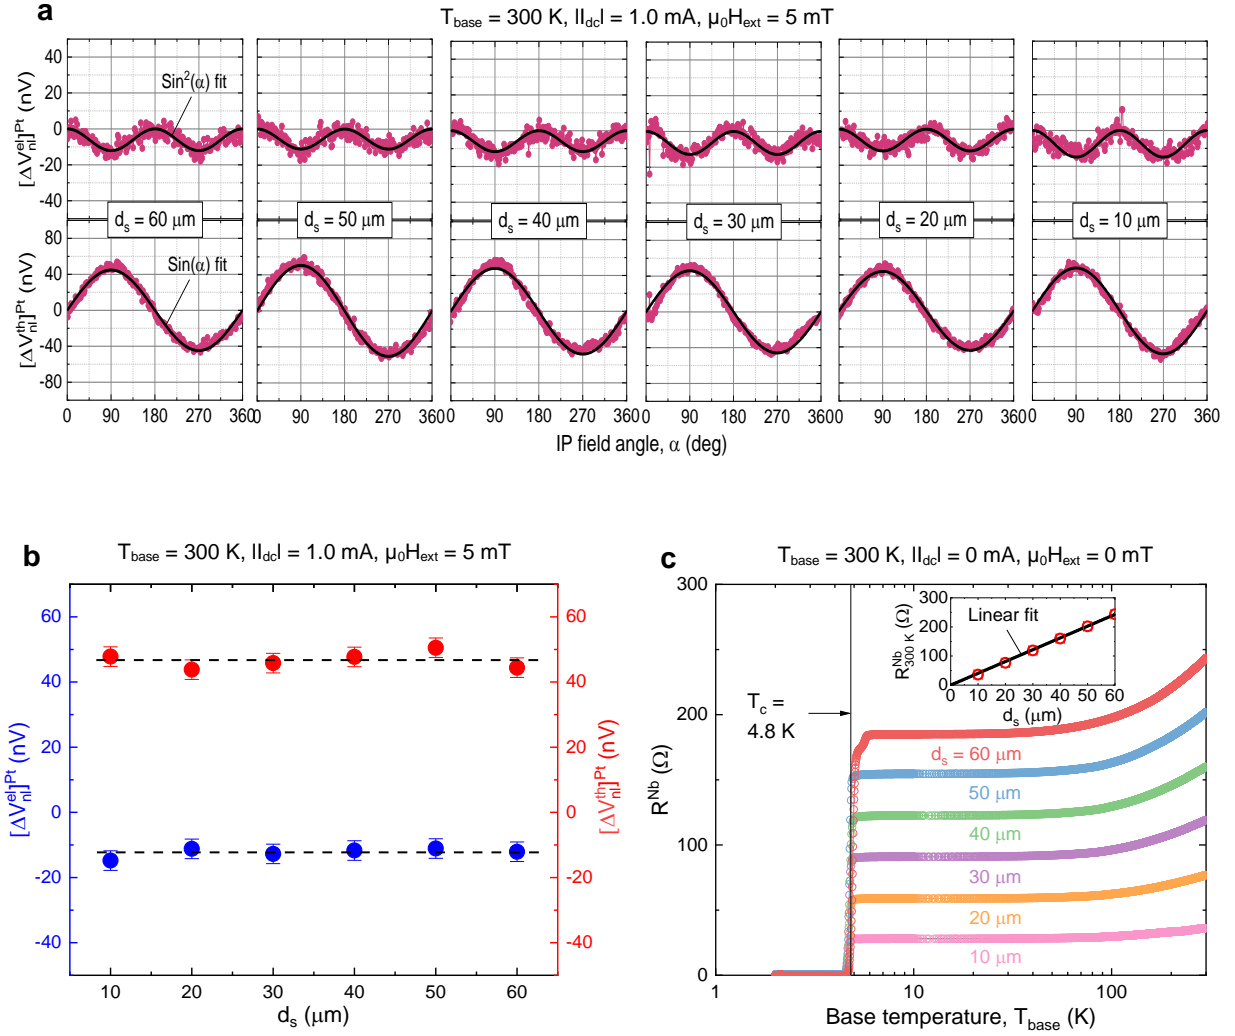

**Figure S4. Non-local magnon spin-transport signals in the  $d_s$ -varying devices probed by the Pt detector. a**, IP field-angle  $\alpha$  dependence of non-local voltages,  $[\Delta V_{\text{nl}}^{\text{el}}]^{\text{Pt}}$  (top) and  $[\Delta V_{\text{nl}}^{\text{th}}]^{\text{Pt}}$  (bottom) driven electrically and thermally, respectively, at 300 K. In these measurements,  $I_{\text{dc}}$  is fixed at  $|1.0|$  mA and the magnetic field  $\mu_0 H_{\text{ext}}$  at 5 mT. **b**, Summary

of  $[\Delta V_{nl}^{el}]^{Pt}$  (blue) and  $[\Delta V_{nl}^{th}]^{Pt}$  (red) as a function of  $d_s$ . The black dashed lines are given as guides to the eye. **c**, Overall base temperature  $T_{\text{base}}$  dependence of Nb resistance  $R^{\text{Nb}}$  for the devices with different  $d_s$ , measured using a four-terminal current-voltage method (using leads 3,4,5,6 in Fig. 6a of the main text). Note that a relatively higher  $T_c$  of the 15-nm-thick Nb layer in these devices than that of the prior device (Fig. 3d of the main text) is due to the better initial base pressure ( $< 1 \times 10^{-9}$  mbar) before film deposition. The inset exhibits the  $d_s$  dependence of Nb resistance at 300K, along with a linear fit (black solid line).

As illustrated in Fig. S5, if the Au/Ru electrical contacts are placed *within* the spin-active length of the Nb detector,  $d_s < l_y$ , Eqs. (S7a) and (S7b) can be respectively rewritten as:

$$V_{iSHE}^{qp} = \theta_{SH}^{qp} j_{s0}^{qp} \left( \frac{l_*^{qp}}{t_{SC}} \right) \tanh \left( \frac{t_{SC}}{2l_*^{qp}} \right) \left( \frac{2e}{\hbar} \right) \rho_{SC}^* d_s \exp \left[ -\frac{(l_y - d_s)}{\lambda_Q} \right], \quad (\text{S14a})$$

$$V_{iSHE} = \theta_{SH} j_{s0} \left( \frac{l_{sd}}{t_{SC}} \right) \tanh \left( \frac{t_{SC}}{2l_{sd}} \right) \left( \frac{2e}{\hbar} \right) \rho_0 d_s, \quad (\text{S14b})$$

Here,  $\exp \left[ -\frac{(l_y - d_s)}{\lambda_Q} \right]$  describes the characteristic spatial dependence of QP charge-imbalance relaxation effect<sup>S16</sup> *inside* the spin-active regime of the Nb detector.

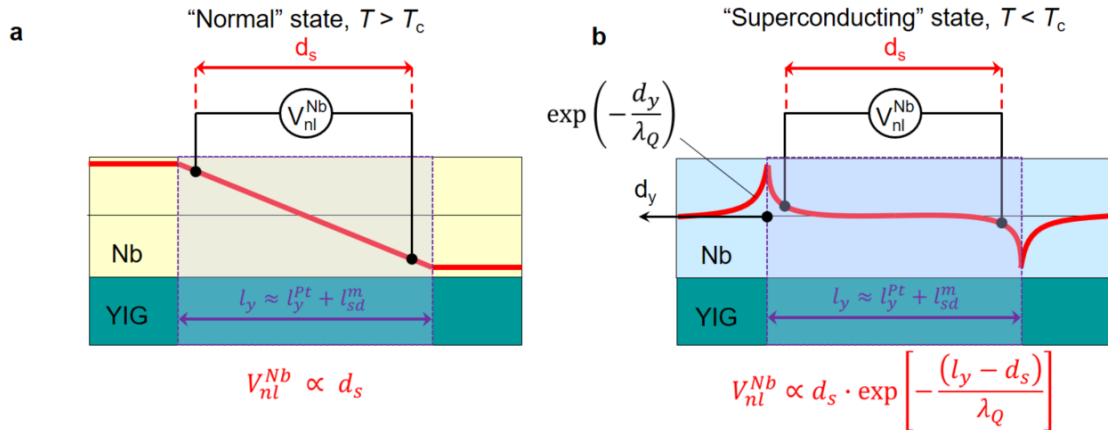

**Figure S5.** Transverse spatial profile of the iSHE voltage  $V_{iSHE}^{(qp)}$  induced by non-local magnon spin-transport in Nb/YIG layers above (a) and below (b) the

**superconducting transition  $T_c$  of Nb.** In b,  $\exp\left[-\frac{(l_y-d_s)}{\lambda_Q}\right]$  describes the characteristic spatial dependence of QP charge-imbalance relaxation effect<sup>S16</sup> *inside* the spin-active regime of the Nb layer, where  $d_s$  is the separation distance of electrical contacts on the Nb and  $\lambda_Q$  is the QP charge-imbalance relaxation length. The wine dashed line represents the spin-active regime that is given approximately by the sum of the length of the Pt injector  $l_y^{Pt}$  and the magnon spin-diffusion length  $l_{sd}^m$  in our device geometry. Note that if the electrical contacts are placed *outside* the spin-active regime,  $V_{ISHE}^{qp} \propto \exp\left(\frac{-d_y}{\lambda_Q}\right)$ .<sup>S16,S17,S22</sup> Here,  $d_y$  is the distance between the inner edges of the QP-spin-excited Nb and the electrical contact.

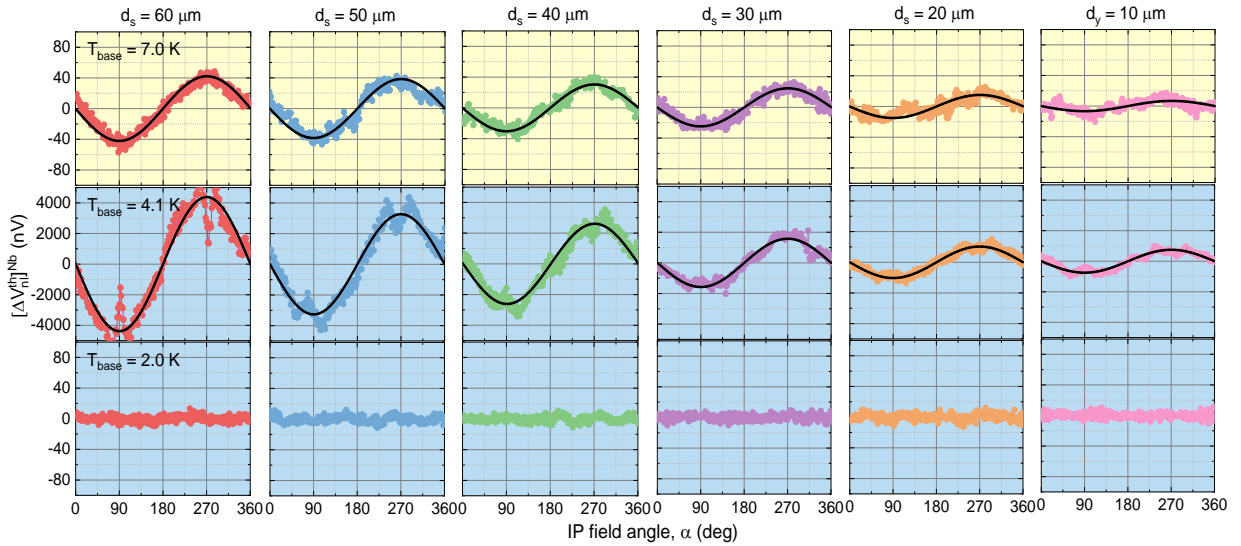

**Figure S6. Non-local magnon spin-transport signals in the  $d_s$ -varying devices measured by the Nb detector.** Typical examples of thermally driven non-local voltages

$[\Delta V_{nl}^{th}(\alpha)]^{Nb}$  as a function of IP field angle  $\alpha$  for the devices with different  $d_s$ , taken above (top), immediately below (middle), and far below (bottom)  $T_c$  of the Nb layer, from which the data presented in Fig. 6b of the main text was extracted. The black solid lines are  $\sin(\alpha)$  fits. In these measurements,  $I_{dc}$  is fixed at  $|0.5|$  mA and the magnetic field  $\mu_0 H_{ext}$  at 5 mT.

## References

- (S1) Shan, J.; Cornelissen, L. J.; Liu, J.; Ben Youssef, J.; Liang, L.; van Wees, B. J. Criteria for Accurate Determination of the Magnon Relaxation Length from the Nonlocal Spin Seebeck Effect. *Phys. Rev. B* **2017**, *96*, 184427.
- (S2) Cornelissen, L. J.; Liu, J.; Duine, R. A.; Ben Youssef, J.; van Wees, B. J. Long-Distance Transport of Magnon Spin Information in a Magnetic Insulator at Room Temperature. *Nat. Phys.* **2015**, *11*, 1022–1026.
- (S3) Cornelissen, L. J.; Shan, J.; van Wees, B. J. Temperature Dependence of the Magnon Spin Diffusion Length and Magnon Spin Conductivity in the Magnetic Insulator Yttrium Iron Garnet. *Phys. Rev. B* **2016**, *94*, 180402(R).
- (S4) Cornelissen, L. J.; Peters, K. J. H.; Bauer, G. E. W.; Duine, R. A.; van Wees, B. J. Magnon Spin Transport Driven by the Magnon Chemical Potential in a Magnetic Insulator. *Phys. Rev. B* **2016**, *94*, 014412.
- (S5) Bender, S. A.; Duine, R. A.; Tserkovnyak, Y. Electronic Pumping of Quasi-Equilibrium Bose-Einstein-Condensed Magnons. *Phys. Rev. Lett.* **2012**, *108*, 246601.
- (S6) Shan, J.; Cornelissen, L. J.; Vlietstra, N.; Youssef, J. B.; Kuschel, T.; Duine, R. A.; van Wees, B. J. Influence of Yttrium Iron Garnet Thickness and Heater Opacity on the Nonlocal Transport of Electrically and Thermally Excited Magnons. *Phys. Rev. B* **2016**, *94*, 174437.
- (S7) Landau, L. D.; Ginzburg, V. L. On the Theory of Superconductivity. *Zh. Eksp. Teor. Fiz.* **1950**, *20*, 1064–1082.
- (S8) Banerjee, N.; Ouassou, J. A.; Zhu, Y.; Stelmashenko, N. A.; Linder, J.; Blamire, M. G. Controlling the Superconducting Transition by Spin-Orbit Coupling. *Phys. Rev. B* **2018**, *97*, 184521.

- (S9) Gu, J. Y.; Caballero, J. A.; Slater, R. D.; Loloee, R.; Pratt, W. P. Direct Measurement of Quasiparticle Evanescent Waves in a Dirty Superconductor. *Phys. Rev. B* **2002**, *66*, 140507(R).
- (S10) Nogaret, A. Electron Dynamics in Inhomogeneous Magnetic Fields. *J. Phys.: Condens. Matter* **2010**, *22*, 253201.
- (S11) Dash, S. P.; Sharma, S.; Le Breton, J. C.; Peiro, J.; Jaffrès, H.; George, J.-M.; Lemaître, A.; Jansen, R. Spin Precession and Inverted Hanle Effect in a Semiconductor near a Finite-Roughness Ferromagnetic Interface. *Phys. Rev. B* **2011**, *84*, 054410.
- (S12) Inoue, M.; Ichioka, M.; Adachi, H. Spin Pumping into Superconductors: A New Probe of Spin Dynamics in a Superconducting Thin Film. *Phys. Rev. B* **2017**, *96*, 024414.
- (S13) Kato, T.; Ohnuma, Y.; Matsuo, M.; Rech, J.; Jonckheere, T.; Martin, T. Microscopic Theory of Spin Transport at the Interface between a Superconductor and a Ferromagnetic Insulator. *Phys. Rev. B* **2019**, *99*, 144411.
- (S14) Klein, O.; Nicol, E. J.; Holczer, K.; Grüner, G. Conductivity Coherence Factors in the Conventional Superconductors Nb and Pb. *Phys. Rev. B* **1994**, *50*, 6307.
- (S15) Takahashi, S.; Maekawa, S. Hall Effect Induced by a Spin-Polarized Current in Superconductors, *Phys. Rev. Lett.* **2002**, *88*, 116601.
- (S16) Takahashi, S.; Maekawa, S. Spin Hall Effect in Superconductors. *Jpn. J. Appl. Phys.* **2012**, *51*, 010110.
- (S17) Jeon, K.-R.; Ciccarelli, C.; Kurebayashi, H.; Wunderlich, J.; Cohen, L. F.; Komori, S.; Robinson, J. W. A.; Blamire, M. G. Spin-Pumping-Induced Inverse Spin-Hall Effect in Nb/Ni<sub>80</sub>Fe<sub>20</sub> Bilayers and Its Strong Decay across the Superconducting Transition Temperature. *Phys. Rev. Applied* **2018**, *10*, 014029.
- (S18) Berger, L. Side-Jump Mechanism for the Hall Effect of Ferromagnets. *Phys. Rev. B* **1970**, *2*, 4559.

- (S19) Smit, J. The Spontaneous Hall Effect in Ferromagnetics I, *Physica* **1955**, *21*, 877(1955); Smit, J. The Spontaneous Hall Effect in Ferromagnetics II, *Physica* **1958**, *24*, 39.
- (S20) Gu, J. Y.; Caballero, J. A.; Slater, R. D.; Loloee, R.; Pratt, W. P. Direct Measurement of Quasiparticle Evanescent Waves in a Dirty Superconductor. *Phys. Rev. B* **2002**, *66*, 140507.
- (S21) Yamashita, T.; Takahashi, S.; Imamura, H.; Maekawa, S. Spin Transport and Relaxation in Superconductors. *Phys. Rev. B* **2002**, *65*, 172509.
- (S22) Wakamura, T.; Akaike, H.; Omori, Y.; Niimi, Y.; Takahashi, S.; Fujimaki, A.; Maekawa, A.; Otani, Y. Quasiparticle-Mediated Spin Hall Effect in a Superconductor. *Nat. Mater.* **2015**, *14*, 675–678.
